# Supplementary material for: Impact of MgtC on the Fitness of Yersinia pseudotuberculosis
Source: MDPI journal article supplement (doi:10.3390/pathogens12121428), 2023-12-08
Supplement: s1 [file s1]

**Table S2 List of DEGs between PB1+ and  $\Delta$ mgtC mutant within macrophages**

| Gene number  | Gene name                                              | Fold change<br>$\Delta$ mgtC/ PB1+ | <i>p</i> -value |
|--------------|--------------------------------------------------------|------------------------------------|-----------------|
| YPTS_0023    | nitrogen regulation protein NR(I)                      | 2.147149827                        | 5.81E-07        |
| YPTS_0024    | nitrogen regulation protein NR(II)                     | 2.525869672                        | 0.003252097     |
| YPTS_0025    | glutamate--ammonia ligase                              | 2.209754743                        | 2.43E-09        |
| YPTS_0078    | ABC transporter substrate-binding protein              | 2.394514719                        | 4.50E-11        |
| YPTS_0090    | glycerol kinase GlpK                                   | 0.323951542                        | 1.78E-26        |
| YPTS_0091    | aquaporin family protein                               | 0.219090038                        | 1.55E-28        |
| YPTS_0110    | methylenetetrahydrofolate reductase                    | 2.711845614                        | 1.52E-08        |
| YPTS_0183    | UDP-N-acetyl-D-mannosamine dehydrogenase               | 0.413035902                        | 4.77E-18        |
| YPTS_0184    | dTDP-glucose 4,6-dehydratase                           | 0.465528239                        | 1.20E-15        |
| YPTS_RS01165 | hypothetical protein                                   | 0.475835831                        | 0.000713797     |
| YPTS_0224    | anaerobic glycerol-3-phosphate dehydrogenase subunit A | 0.236100615                        | 1.77E-33        |
| YPTS_0225    | glycerol-3-phosphate dehydrogenase subunit GlpB        | 0.260504109                        | 1.03E-31        |
| YPTS_0226    | anaerobic glycerol-3-phosphate dehydrogenase subunit C | 0.378057445                        | 3.30E-18        |

|           |                                                                       |                |             |
|-----------|-----------------------------------------------------------------------|----------------|-------------|
| YPTS_0241 | branched-chain amino acid ABC transporter substrate-binding protein   | 2.201098639    | 1.31E-06    |
| YPTS_0263 | HTH-type transcriptional regulator MetR                               | 2.147763459    | 6.09E-05    |
| YPTS_0264 | 5-methyltetrahydropteroyltriglutamate--homocysteine methyltransferase | S- 2.074917763 | 1.40E-09    |
| YPTS_0282 | acetyl-CoA C-acyltransferase FadA                                     | 2.466842652    | 2.41E-11    |
| YPTS_0283 | fatty acid oxidation complex subunit alpha FadB                       | 2.058822243    | 2.20E-10    |
| YPTS_0293 | GNAT family N-acetyltransferase                                       | 2.294317315    | 2.29E-09    |
| YPTS_0304 | DNA-directed RNA polymerase subunit beta                              | 0.455546385    | 2.88E-09    |
| YPTS_0305 | DNA-directed RNA polymerase subunit beta                              | 0.347607115    | 1.82E-14    |
| YPTS_0439 | fumarate reductase (quinol) flavoprotein subunit                      | 0.402613898    | 0.018157336 |
| YPTS_0550 | anaerobic ribonucleoside-triphosphate reductase                       | 0.390709249    | 7.93E-09    |
| YPTS_0571 | 4S)-4-hydroxy-5-phosphonooxypentane-2,3-dione isomerase               | 2.641278509    | 2.59E-11    |
| YPTS_0572 | 3-hydroxy-5-phosphonooxypentane-2,4-dione thiolase                    | 2.92107963     | 7.53E-12    |
| YPTS_0573 | autoinducer 2 ABC transporter substrate-binding protein LsrB          | 2.932189351    | 6.44E-19    |
| YPTS_0574 | autoinducer 2 ABC transporter permease LsrD                           | 2.501774393    | 2.17E-10    |

|           |                                                         |             |          |
|-----------|---------------------------------------------------------|-------------|----------|
| YPTS_0575 | autoinducer 2 ABC transporter permease LsrC             | 2.802127145 | 5.72E-15 |
| YPTS_0576 | autoinducer 2 ABC transporter ATP-binding protein LsrA  | 2.502428804 | 1.19E-13 |
| YPTS_0577 | transcriptional regulator LsrR                          | 2.034727834 | 5.38E-09 |
| YPTS_0578 | autoinducer-2 kinase                                    | 2.590941396 | 1.82E-14 |
| YPTS_0696 | 3-isopropylmalate dehydratase large subunit             | 0.485091038 | 4.90E-07 |
| YPTS_0740 | amino acid permease                                     | 2.459612297 | 2.07E-10 |
| YPTS_0824 | c-type cytochrome                                       | 0.458428333 | 2.26E-08 |
| YPTS_0845 | cytochrome b562                                         | 2.722238154 | 7.88E-09 |
| YPTS_0846 | catalase/peroxidase HPI                                 | 3.164272904 | 2.96E-13 |
| YPTS_0907 | transporter substrate-binding domain-containing protein | 6.494780965 | 2.54E-07 |
| YPTS_0908 | amino acid ABC transporter permease                     | 4.69526671  | 1.82E-05 |
| YPTS_0909 | amino acid ABC transporter permease                     | 3.602257625 | 1.38E-07 |
| YPTS_0919 | S-methyl-5-thioribose kinase                            | 2.240961091 | 3.09E-06 |
| YPTS_1005 | ComEA family DNA-binding protein                        | 2.381736691 | 4.12E-12 |
| YPTS_1014 | P-II family nitrogen regulator                          | 3.52346994  | 1.05E-05 |
| YPTS_1015 | ammonium transporter AmtB                               | 3.836423497 | 6.52E-05 |

|              |                                                        |             |             |
|--------------|--------------------------------------------------------|-------------|-------------|
| YPTS_1023    | 50S ribosomal protein L36                              | 0.43011056  | 2.29E-10    |
| YPTS_1132    | ABC transporter permease                               | 2.172144933 | 0.000340324 |
| YPTS_1133    | Gfo/Idh/MocA family oxidoreductase                     | 2.075483552 | 5.54E-05    |
| YPTS_1164    | amino acid ABC transporter permease                    | 2.391539086 | 2.07E-11    |
| YPTS_1165    | amino acid ABC transporter substrate-binding protein   | 2.869069076 | 2.59E-15    |
| YPTS_RS06050 | hypothetical protein                                   | 2.138355484 | 0.000218254 |
| YPTS_1265    | ABC transporter ATP-binding protein                    | 3.86502002  | 2.73E-06    |
| YPTS_1283    | zinc resistance sensor/chaperone ZraP                  | 2.174156779 | 1.50E-05    |
| YPTS_1310    | GlsB/YeaQ/YmgE family stress response membrane protein | 2.427430937 | 4.86E-10    |
| YPTS_1316    | urea ABC transporter substrate-binding protein         | 4.54845303  | 2.12E-05    |
| YPTS_1317    | urea ABC transporter permease subunit UrtB             | 4.489934827 | 0.000982073 |
| YPTS_1318    | urea ABC transporter permease subunit UrtC             | 2.278188716 | 0.043567279 |
| YPTS_1319    | urea ABC transporter ATP-binding protein UrtD          | 2.503637213 | 0.033076257 |
| YPTS_1320    | urea ABC transporter ATP-binding subunit UrtE          | 2.769848622 | 0.004632756 |
| YPTS_1412    | C-terminal binding protein                             | 2.045768007 | 0.000148772 |
| YPTS_1413    | fumarylacetoacetate hydrolase family protein           | 2.666662892 | 1.56E-09    |

|           |                                                   |             |             |
|-----------|---------------------------------------------------|-------------|-------------|
| YPTS_1415 | aldehyde dehydrogenase family protein             | 3.082736094 | 1.64E-13    |
| YPTS_1416 | xylulokinase                                      | 2.593430791 | 1.69E-06    |
| YPTS_1444 | isopenicillin N synthase family oxygenase         | 2.315114244 | 2.00E-10    |
| YPTS_1445 | ABC transporter substrate-binding protein         | 2.732107005 | 4.86E-10    |
| YPTS_1446 | methionine ABC transporter ATP-binding protein    | 2.764805641 | 7.66E-10    |
| YPTS_1447 | ABC transporter permease                          | 2.301040434 | 2.67E-08    |
| YPTS_1492 | cold shock-like protein CspD                      | 2.429709503 | 2.76E-13    |
| YPTS_1642 | sugar ABC transporter substrate-binding protein   | 6.125790508 | 2.34E-05    |
| YPTS_1685 | MFS transporter                                   | 4.673309228 | 2.73E-06    |
| YPTS_1686 | thiol-disulfide oxidoreductase DCC family protein | 2.080341145 | 1.84E-05    |
| YPTS_1688 | SDR family oxidoreductase                         | 2.878130252 | 2.94E-13    |
| YPTS_1689 | fumarylacetoacetate hydrolase family protein      | 3.942438216 | 4.09E-19    |
| YPTS_1690 | L-fuconate dehydratase                            | 3.296246497 | 1.41E-15    |
| YPTS_1695 | MFS transporter                                   | 2.74091403  | 2.77E-09    |
| YPTS_1696 | polysaccharide deacetylase                        | 3.648973491 | 9.93E-15    |
| YPTS_1710 | yersiniabactin biosynthesis thioesterase YbtT     | 0.483503591 | 0.003506162 |

|           |                                                          |             |             |
|-----------|----------------------------------------------------------|-------------|-------------|
| YPTS_1814 | autoinducer 2 ABC transporter substrate-binding protein  | 2.155565731 | 2.21E-06    |
| YPTS_1855 | hypothetical protein                                     | 0.487364092 | 1.36E-05    |
| YPTS_1961 | Gfo/Idh/MocA family oxidoreductase                       | 2.891991815 | 9.07E-08    |
| YPTS_2005 | phosphate starvation-inducible protein PhoH              | 2.434476246 | 6.91E-15    |
| YPTS_2011 | aspartate aminotransferase family protein                | 5.083721222 | 3.46E-06    |
| YPTS_2012 | arginine N-succinyltransferase                           | 4.080613877 | 9.35E-05    |
| YPTS_2013 | succinylglutamate-semialdehyde dehydrogenase             | 3.268383034 | 0.000223275 |
| YPTS_2014 | N-succinylarginine dihydrolase                           | 3.181079907 | 4.57E-12    |
| YPTS_2015 | succinylglutamate desuccinylase                          | 2.937426506 | 8.02E-10    |
| YPTS_2021 | imidazolonepropionase                                    | 0.45259316  | 7.70E-07    |
| YPTS_2195 | BON domain-containing protein                            | 2.401015691 | 1.38E-11    |
| YPTS_2259 | MFS transporter                                          | 0.391870666 | 2.61E-17    |
| YPTS_2313 | acid-shock protein                                       | 0.269330723 | 5.84E-21    |
| YPTS_2356 | YIP1 family protein                                      | 2.459117501 | 1.82E-14    |
| YPTS_2490 | MgtC family protein                                      | 0.000000953 | 8.20E-99    |
| YPTS_2643 | glutamine ABC transporter substrate-binding protein GlnH | 2.243024614 | 5.38E-09    |

|           |                                                              |             |             |
|-----------|--------------------------------------------------------------|-------------|-------------|
| YPTS_2666 | gluconate 5-dehydrogenase                                    | 0.484383816 | 6.54E-08    |
| YPTS_2670 | NADH-quinone oxidoreductase subunit NuoN                     | 0.464977734 | 3.12E-12    |
| YPTS_2695 | PTS sugar transporter subunit IIB                            | 0.431193795 | 3.13E-14    |
| YPTS_2701 | histidine ABC transporter ATP-binding protein HisP           | 2.754590379 | 0.002051971 |
| YPTS_2702 | ABC transporter permease subunit                             | 2.977761796 | 0.003006144 |
| YPTS_2703 | ABC transporter permease subunit                             | 3.535165988 | 0.000426441 |
| YPTS_2704 | histidine ABC transporter substrate-binding protein HisJ     | 3.634787612 | 6.52E-06    |
| YPTS_2736 | long-chain fatty acid transporter FadL                       | 2.602374118 | 9.73E-13    |
| YPTS_2831 | cysteine synthase CysM                                       | 2.299971516 | 3.62E-08    |
| YPTS_2832 | sulfate/thiosulfate ABC transporter ATP-binding protein CysA | 2.688614703 | 2.47E-12    |
| YPTS_2833 | sulfate/thiosulfate ABC transporter permease CysW            | 2.215453542 | 1.38E-08    |
| YPTS_2834 | sulfate/thiosulfate ABC transporter permease CysT            | 2.296583549 | 9.82E-10    |
| YPTS_2876 | ABC transporter substrate-binding protein                    | 2.010223102 | 1.56E-09    |
| YPTS_2925 | DUF1508 domain-containing protein                            | 2.100229635 | 8.94E-12    |
| YPTS_3071 | acid shock protein                                           | 0.169892076 | 3.40E-08    |
| YPTS_3294 | lysine--tRNA ligase                                          | 0.45192401  | 3.64E-13    |

|           |                                                          |             |             |
|-----------|----------------------------------------------------------|-------------|-------------|
| YPTS_3310 | lipocalin-like domain-containing protein                 | 2.407340506 | 6.10E-10    |
| YPTS_3792 | aliphatic sulfonates ABC transporter ATP-binding protein | 2.410116634 | 2.63E-07    |
| YPTS_3794 | FMNH2-dependent alkanesulfonate monooxygenase            | 2.678473672 | 0.003107434 |
| YPTS_3840 | glyoxylate bypass operon transcriptional repressor IclR  | 2.50468052  | 4.95E-09    |
| YPTS_3841 | bifunctional isocitrate dehydrogenase kinase/phosphatase | 3.290116342 | 8.71E-13    |
| YPTS_3842 | isocitrate lyase                                         | 5.081315499 | 1.19E-07    |
| YPTS_3843 | malate synthase A                                        | 5.255803787 | 4.88E-09    |
| YPTS_3892 | bacterioferritin                                         | 2.099088125 | 8.15E-09    |
| YPTS_3911 | taurine dioxygenase                                      | 2.767316039 | 1.76E-11    |
| YPTS_3912 | taurine ABC transporter permease TauC                    | 2.360295242 | 7.66E-09    |
| YPTS_3979 | glycerol-3-phosphate dehydrogenase                       | 0.39641426  | 1.64E-13    |
| YPTS_4021 | DDE-type integrase/transposase/recombinase               | 2.097233419 | 9.15E-09    |
| YPTS_4025 | universal stress protein UspB                            | 2.755884608 | 5.64E-10    |
| YPTS_4058 | ABC transporter substrate-binding protein                | 2.846840716 | 1.33E-15    |
| YPTS_4063 | uptakes hexose phosphates and regulates uhpT             | 0.475293685 | 3.29E-08    |
| YPTS_4184 | glutamine--fructose-6-phosphate transaminase             | 0.498768698 | 2.75E-11    |

|              |                                                         |             |             |
|--------------|---------------------------------------------------------|-------------|-------------|
| YPTS_4192    | transporter substrate-binding domain-containing protein | 2.290503493 | 1.12E-11    |
| YPTS_4193    | amino acid ABC transporter permease                     | 2.253607139 | 1.52E-08    |
| YPTS_RS21675 | AAA family ATPase                                       | 2.682206191 | 0.001944559 |
| YPTS_4183    | hypothetical protein                                    | 0.490194232 | 0.000288531 |

---
