# Supplementary material for: Impact of MgtC on the Fitness of Yersinia pseudotuberculosis
Source: MDPI journal article supplement (doi:10.3390/pathogens12121428), 2023-12-08
Supplement: s1 [file s1]

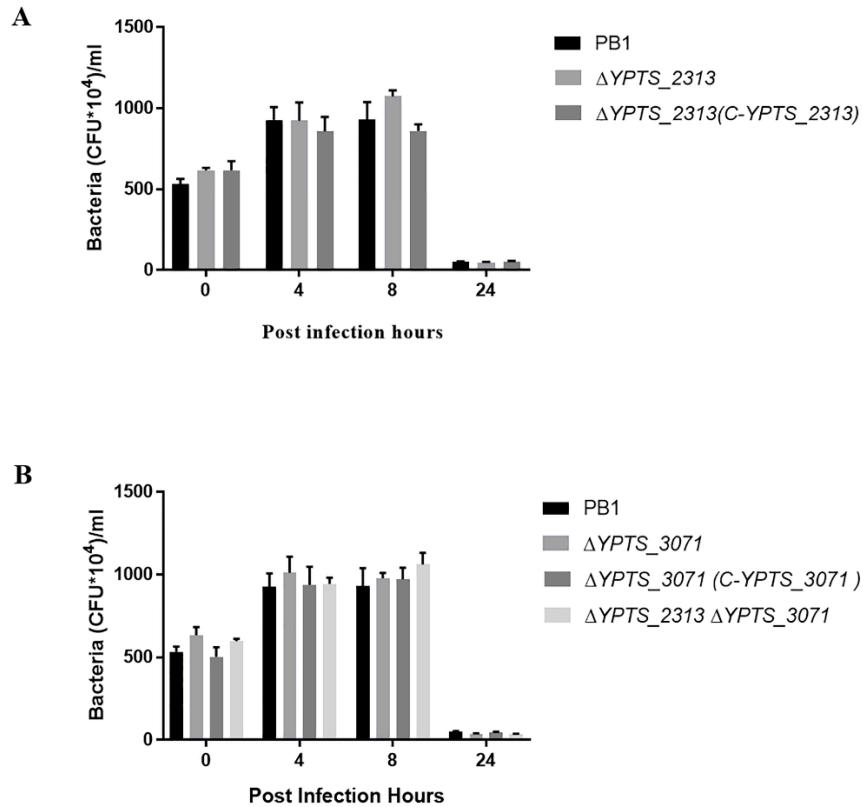

**Figure S2. Intracellular survival within RAW 264.7 macrophages.** RAW264.7 cells were infected with different *Y. pseudotuberculosis* strains at a MOI of 20. The infected cells were incubated with 0.2% (v/v) Triton X-100 at 0 h, 4 h, 8 h and 24 h p.i.. Then, intracellular CFUs of bacteria were enumerated. (A) RAW264.7 cells were infected with WT PB1+,  $\Delta YPTS\_2313$ , and  $\Delta YPTS\_2313(C-YPTS\_2313)$  (B) RAW264.7 cells were infected with WT PB1+,  $\Delta YPTS\_3071$ ,  $\Delta YPTS\_2313\Delta YPTS\_3071$  and  $\Delta YPTS\_3071(C-YPTS\_3071)$ . The experiment was performed twice and pooled together.
