# Supplementary material for: Impact of MgtC on the Fitness of Yersinia pseudotuberculosis
Source: MDPI journal article supplement (doi:10.3390/pathogens12121428), 2023-12-08
Supplement: s1 [file s1]

**Table S1. Primers used in the present study.**

| Primer name          | Sequence <sup>a</sup> (5' to 3')             | Target gene <sup>b</sup>                   |
|----------------------|----------------------------------------------|--------------------------------------------|
| <i>mgtC</i> -UF      | cggcccgggtatatctttgagctgtgcatcccaa           | Upstream fragment of <i>mgtC</i>           |
| <i>mgtC</i> -UR      | actcgtcaggccggagtaatgacatgattctctccatga      | Upstream fragment of <i>mgtC</i>           |
| <i>mgtC</i> -DF      | tcatgtcattaactccggcctgacgagtcattaattaagcg    | Downstream fragment of <i>mgtC</i>         |
| <i>mgtC</i> -DR      | cggggtaccgcataacgcttctctttaattca             | Downstream fragment of <i>mgtC</i>         |
| <i>YPTS_2313</i> -UF | cggggtaccagattcccttttgcttgattca              | Upstream fragment of <i>YPTS_2313</i>      |
| <i>YPTS_2313</i> -UR | ctgtctccaactcaatgggggattcgcttcctcagtggtctatt | Upstream fragment of <i>YPTS_2313</i>      |
| <i>YPTS_2313</i> -DF | aatagaacactgaggaacgaatccccattgagttggagacag   | Downstream fragment of <i>YPTS_2313</i>    |
| <i>YPTS_2313</i> -DR | cggcccgggcaacgcgacggcttggtcaata              | Downstream fragment of <i>YPTS_2313</i>    |
| <i>YPTS_3071</i> -UF | cggggtacccttccaaaactttagcgacttc              | Upstream fragment of <i>YPTS_3071</i>      |
| <i>YPTS_3071</i> -UR | acaaactctgaggatttgaaaggcgccccagaggtgtatca    | Upstream fragment of <i>YPTS_3071</i>      |
| <i>YPTS_3071</i> -DF | tgatacaacctctgggggcgaccttcaaatcctcagagtttgt  | Downstream fragment of <i>YPTS_3071</i>    |
| <i>YPTS_3071</i> -DR | cggcccgggtatgagatgccttgctgtcga               | Downstream fragment of <i>YPTS_3071</i>    |
| <i>mgtC</i> -F       | cggggatccctcgacggtaaatgtcgagggtatta          | <i>mgtC</i> containing the promoter region |
| <i>mgtC</i> -R       | cggggtaccactcgtcaggccggaattcagatg            | <i>mgtC</i> containing the promoter region |

|                         |                                           |                                                 |
|-------------------------|-------------------------------------------|-------------------------------------------------|
| <i>YPTS_2313</i> -F     | cg <u>ggaattc</u> attaattttgagatccactgtct | <i>YPTS_2313</i> containing the promoter region |
| <i>YPTS_2313</i> -R     | cgga <u>agctt</u> ctatttagccgctggtgctac   | <i>YPTS_2313</i> containing the promoter region |
| <i>YPTS_3071</i> -F     | cg <u>ggaattc</u> atccgctattcaggataaggc   | <i>YPTS_3071</i> containing the promoter region |
| <i>YPTS_3071</i> -R     | cgga <u>agctt</u> ttatgctgcgggtgccgctact  | <i>YPTS_3071</i> containing the promoter region |
| RT- <i>rpoD</i> -F      | cgatgcacccgtgaacgta                       | <i>rpoD</i>                                     |
| RT- <i>rpoD</i> -R      | aatcgtcgaggaagctacgc                      | <i>rpoD</i>                                     |
| RT- <i>mgtC</i> -F      | taaatctatgcctgctgttga                     | <i>mgtC</i>                                     |
| RT- <i>mgtC</i> -R      | gctttgtggtctgggtttgtac                    | <i>mgtC</i>                                     |
| RT- <i>YPTS_2313</i> -F | taacgcatcagctaaaaccatg                    | <i>YPTS_2313</i>                                |
| RT- <i>YPTS_2313</i> -R | tggtatgtgccgctttatggt                     | <i>YPTS_2313</i>                                |
| RT- <i>YPTS_0225</i> -F | catggttgagcctggcggacat                    | <i>YPTS_0225</i>                                |
| RT- <i>YPTS_0225</i> -R | ccctgacctgtaaggcactcg                     | <i>YPTS_0225</i>                                |
| RT- <i>YPTS_0224</i> -F | tgatggcactgtcgatcctttc                    | <i>YPTS_0224</i>                                |
| RT- <i>YPTS_0224</i> -R | ctgccgcaacaaccgataact                     | <i>YPTS_0224</i>                                |
| RT- <i>YPTS_0091</i> -F | atggcggaatgactgtttcaa                     | <i>YPTS_0091</i>                                |
| RT- <i>YPTS_0091</i> -R | tccaactggcaggatatctctc                    | <i>YPTS_0091</i>                                |

|                         |                          |                  |
|-------------------------|--------------------------|------------------|
| RT- <i>YPTS_3071</i> -F | ctttagtttgagcagcaacagt   | <i>YPTS_3071</i> |
| RT- <i>YPTS_3071</i> -R | ccaccctgggtctatcttcagt   | <i>YPTS_3071</i> |
| RT- <i>YPTS_0907</i> -F | ggaagacatggtattaagcgagat | <i>YPTS_0907</i> |
| RT- <i>YPTS_0907</i> -R | ccagattgccagttgccagata   | <i>YPTS_0907</i> |
| RT- <i>YPTS_1642</i> -F | attggcgttaccatcgaagtct   | <i>YPTS_1642</i> |
| RT- <i>YPTS_1642</i> -R | cactgctattcaggcgagatt    | <i>YPTS_1642</i> |
| RT- <i>YPTS_3843</i> -F | caactcagcggcggataggt     | <i>YPTS_3843</i> |
| RT- <i>YPTS_3843</i> -R | tggcagatacgggtgatggacgt  | <i>YPTS_3843</i> |
| RT- <i>YPTS_2011</i> -F | gccgcacgctgttacggtctc    | <i>YPTS_2011</i> |
| RT- <i>YPTS_2011</i> -R | gtgtccgctgaagcaaggtca    | <i>YPTS_2011</i> |
| RT- <i>YPTS_3842</i> -F | tcgcaatctgaggtcaataaatc  | <i>YPTS_3842</i> |
| RT- <i>YPTS_3842</i> -R | tatgggcggtaaggtagtg      | <i>YPTS_3842</i> |

---

*a Underlining indicates restriction endonuclease recognition sequences.*

*b Y. pseudotuberculosis locus tags listed are for genes in Y. pseudotuberculosis PB1+.*
